# Supplementary material for: Induction chemotherapy followed by concurrent chemoradiotherapy versus concurrent chemoradiotherapy alone in stage III-IVb nasopharyngeal carcinoma patients with Epstein-Barr virus DNA ≥4000 copies/ml: a matched study
Source: PubMed Central journal article supplement (PMC5045429; doi:10.18632/oncotarget.8828), 2016-04-18
Supplement: oncotarget-07-29739-s001.pdf [file oncotarget-07-29739-s001.pdf]

**SUPPLEMENTARY TABLE****Supplementary Table S1: The comparison of DMFS, LRFS, and PFS between the CCRT and IC+CCRT groups**

|                              | <b>CCRT</b> | <b>IC+CCRT</b> | <b>P value</b> |
|------------------------------|-------------|----------------|----------------|
| <b>DMFS (Median, Months)</b> | 46          | 49             | 0.219          |
| <b>LRFS (Median, Months)</b> | 48          | 50             | 0.319          |
| <b>PFS (Median, Months)</b>  | 45          | 48             | 0.12           |

*Abbreviations:* DMFS=distant metastasis-free survival; LRFS=locoregional recurrence-free survival; PFS=progression-free survival.
